# Supplementary material
Source: publisher site journal article supplement (https://static.cambridge.org/content/id/urn:cambridge.org:id:article:S0714980819000734/resource/name/S0714980819000734supp001.pdf)
Supplement: Supplementary file 1 [file S0714980819000734supp001.pdf]

# Appendix 1

MALE SURVEY Study ID \_\_\_\_\_

Date (dd/mm/yy) \_\_\_/\_\_\_/\_\_\_

## Part A) Demographics

1) Age \_\_\_\_ years

2) Gender

(choose one)

- Male
- Transgender (Female to Male)
- Transgender (Male to Female)

3) Marital Status

(choose one)

- Married
- Separated or Divorced
- Widowed
- Never Married

## Part B) Health History

4) How would you rate your **CURRENT** health status?

(choose one)

- Poor
- Good
- Excellent

5) Select all the medical conditions you have ever been diagnosed with.

(choose ALL that apply)

- Arthritis (ie Osteoarthritis, Rheumatoid arthritis)
- Cancer
- Chronic Pain
- Diabetes
- Heart disease (ie High blood pressure, Heart attack, Stroke, TIA, Heart failure)
- Mental Health Illness (ie Dementia, Depression, Addictions, Anxiety)
- Respiratory Disease (ie Asthma, COPD, Emphysema, Chronic Bronchitis)

---

---

---

**6) How many medications do you take daily?**

*(choose one)*

- None
  - 1-5
  - 6-10
  - >10
- 

**7) How often have you seen your family doctor in the past year?**

*(choose one)*

- Once
  - Every 6 months
  - Every 3 months
  - Every month
- 

**Part C) Sexual Health**

---

---

**8) What is the gender of your sexual partner(s)?**

*(choose one)*

- Female
  - Male
  - Both
- 

**9) Are you currently sexually active?**

*(choose one)*

- Yes
  - No
- 

**10) When were you last sexually active?**

*(choose one)*

- <3 months ago
- 3-6 months ago
- 7-12 months ago
- 1-5 years ago
- 6-10 years ago
- >10 years ago

---

**11) How frequently are you sexually active?**

*(choose one)*

- 0 times per month
  - 1-3 times per month
  - 4-5 times per month
  - >5 times per month
- 

**12) In the past 12 months what sexual activities have you participated in?**

*(choose ALL that apply)*

- Oral sex
  - Vaginal intercourse
  - Anal intercourse
  - Masturbation
- 

**13) How IMPORTANT is it for you to be sexually active?**

- |                          |                          |                          |                          |                          |
|--------------------------|--------------------------|--------------------------|--------------------------|--------------------------|
| <input type="checkbox"/> |
| 1                        | 2                        | 3                        | 4                        | 5                        |
| Not Important            |                          | Somewhat Important       |                          | Very Important           |
- 

**14) Which of the following sexual health issues apply do you?**

*(choose ALL that apply)*

- |                                                                     |                                                                  |
|---------------------------------------------------------------------|------------------------------------------------------------------|
| <input type="checkbox"/> Difficulty achieving/maintaining erections | <input type="checkbox"/> Performance anxiety                     |
| <input type="checkbox"/> Grief                                      | <input type="checkbox"/> Physical health problems limiting sex   |
| <input type="checkbox"/> Have not met willing partner               | <input type="checkbox"/> Premature ejaculation                   |
| <input type="checkbox"/> Inability to climax                        | <input type="checkbox"/> Risk of sexually transmitted infections |
| <input type="checkbox"/> Religious beliefs                          | <input type="checkbox"/> Sex is not pleasurable                  |
| <input type="checkbox"/> Pain with intercourse                      | <input type="checkbox"/> Other _____                             |
| <input type="checkbox"/> Partner not interested in sex              |                                                                  |
- 

**15) Do you AVOID sexual activity because of any of the issues listed above?**

*(choose one)*

- Yes
  - No
-

**Part D) Access to Health Care**

**16) Have you talked about your sexual health with your family doctor in the past 12 months?**  
(choose one)

- Yes
- No

**17) Which of the following have you discussed with your family doctor in the past 12 months?**  
(choose ALL that apply)

- Difficulty achieving/maintaining erections
- Grief
- Have not met willing partner
- Inability to climax
- Religious beliefs
- Pain with intercourse
- Partner not interested in sex
- Performance anxiety
- Physical health problems limiting sex
- Premature ejaculation
- Risk of sexually transmitted infections
- Sex is not pleasurable
- Other \_\_\_\_\_
- None of the above

**18) Do you feel comfortable discussing your sexual health with your family doctor?**

- |                          |                          |                          |                          |                          |
|--------------------------|--------------------------|--------------------------|--------------------------|--------------------------|
| <input type="checkbox"/> |
| 1                        | 2                        | 3                        | 4                        | 5                        |
| Not                      |                          | Somewhat                 |                          | Very                     |
| Comfortable              |                          | Comfortable              |                          | Comfortable              |

**19) Do you want to talk to your doctor about any of the following?**

- |                                          | Yes                      | No                       |
|------------------------------------------|--------------------------|--------------------------|
| A) Your current sexual activity?         | <input type="checkbox"/> | <input type="checkbox"/> |
| B) Ways to improve your sexual function? | <input type="checkbox"/> | <input type="checkbox"/> |
| C) Sexually transmitted infections?      | <input type="checkbox"/> | <input type="checkbox"/> |

**20) How would you want a conversation about your sexual health to be started?**  
(choose one)

- By myself
- By my doctor

## Part A) Demographics

1) Age \_\_\_\_ years

---

### 2) Gender

(choose one)

- Female
  - Transgender (Male to Female)
  - Transgender (Female to Male)
- 

### 3) Marital Status

(choose one)

- Married
  - Separated or Divorced
  - Widowed
  - Never Married
- 

## Part B) Health History

### 4) How would you rate your CURRENT health status?

(choose one)

- Poor
  - Good
  - Excellent
- 

### 5) Select all the medical conditions you have ever been diagnosed with.

(choose ALL that apply)

- Arthritis (ie Osteoarthritis, Rheumatoid arthritis)
  - Cancer
  - Chronic Pain
  - Diabetes
  - Heart disease (ie High blood pressure, Heart attack, Stroke, TIA, Heart failure)
  - Mental Health Illness (ie Dementia, Depression, Addictions, Anxiety)
  - Respiratory Disease (ie Asthma, COPD, Emphysema, Chronic Bronchitis)
-

---

**6) How many medications do you take daily?**

*(choose one)*

- None
  - 1-5
  - 6-10
  - >10
- 

**7) How often have you seen your family doctor in the past year?**

*(choose one)*

- Once
  - Every 6 months
  - Every 3 months
  - Every month
- 

**Part C) Sexual Health**

---

**8) What is the gender of your sexual partner(s)?**

*(choose one)*

- Male
  - Female
  - Both
- 

**9) Are you currently sexually active?**

*(choose one)*

- Yes
  - No
- 

**10) When were you last sexually active?**

*(choose one)*

- <3 months ago
- 3-6 months ago
- 7-12 months ago
- 1-5 years ago
- 6-10 years ago
- >10 years ago

---

**11) How frequently are you sexually active?**

*(choose one)*

- 0 times per month
  - 1-3 times per month
  - 4-5 times per month
  - >5 times per month
- 

**12) In the past 12 months what sexual activities have you participated in?**

*(choose ALL that apply)*

- Oral sex
  - Vaginal intercourse
  - Anal intercourse
  - Masturbation
- 

**13) How IMPORTANT is it for you to be sexually active?**

- |                          |                          |                          |                          |                          |
|--------------------------|--------------------------|--------------------------|--------------------------|--------------------------|
| <input type="checkbox"/> |
| 1                        | 2                        | 3                        | 4                        | 5                        |
| Not Important            |                          | Somewhat Important       |                          | Very Important           |
- 

**14) Which of the following sexual health issues apply do you?**

*(choose ALL that apply)*

- |                                                              |                                                                  |
|--------------------------------------------------------------|------------------------------------------------------------------|
| <input type="checkbox"/> Bleeding with sexual activity       | <input type="checkbox"/> Partner not interested in sex           |
| <input type="checkbox"/> Difficulty with vaginal lubrication | <input type="checkbox"/> Performance anxiety                     |
| <input type="checkbox"/> Grief                               | <input type="checkbox"/> Physical health problems limiting sex   |
| <input type="checkbox"/> Have not met willing partner        | <input type="checkbox"/> Risk of sexually transmitted infections |
| <input type="checkbox"/> Inability to climax                 | <input type="checkbox"/> Sex is not pleasurable                  |
| <input type="checkbox"/> Religious beliefs                   | <input type="checkbox"/> Other _____                             |
| <input type="checkbox"/> Pain with intercourse               |                                                                  |
- 

**15) Do you AVOID sexual activity because of any of the issues listed above?**

*(choose one)*

- Yes
  - No
-

## Part D) Access to Health Care

**16) Have you talked about your sexual health with your family doctor in the past 12 months?**  
(choose one)

- Yes  
 No

**17) Which of the following have you discussed with your family doctor in the past 12 months?**  
(choose ALL that apply)

- |                                                              |                                                                  |
|--------------------------------------------------------------|------------------------------------------------------------------|
| <input type="checkbox"/> Bleeding with sexual activity       | <input type="checkbox"/> Partner not interested in sex           |
| <input type="checkbox"/> Difficulty with vaginal lubrication | <input type="checkbox"/> Performance anxiety                     |
| <input type="checkbox"/> Grief                               | <input type="checkbox"/> Physical health problems limiting sex   |
| <input type="checkbox"/> Have not met willing partner        | <input type="checkbox"/> Risk of sexually transmitted infections |
| <input type="checkbox"/> Inability to climax                 | <input type="checkbox"/> Other _____                             |
| <input type="checkbox"/> Religious beliefs                   |                                                                  |
| <input type="checkbox"/> Pain with intercourse               | <input type="checkbox"/> None of the above                       |

**18) Do you feel comfortable discussing your sexual health with your family doctor?**

- |                          |                          |                          |                          |                          |
|--------------------------|--------------------------|--------------------------|--------------------------|--------------------------|
| <input type="checkbox"/> |
| 1                        | 2                        | 3                        | 4                        | 5                        |
| Not                      |                          | Somewhat                 |                          | Very                     |
| Comfortable              |                          | Comfortable              |                          | Comfortable              |

**19) Do you want to talk to your doctor about any of the following?**

- |                                          | Yes                      | No                       |
|------------------------------------------|--------------------------|--------------------------|
| A) Your current sexual activity?         | <input type="checkbox"/> | <input type="checkbox"/> |
| B) Ways to improve your sexual function? | <input type="checkbox"/> | <input type="checkbox"/> |
| C) Sexually transmitted infections?      | <input type="checkbox"/> | <input type="checkbox"/> |

**20) How would you want a conversation about your sexual health to be started?**  
(choose ALL that apply)

- By myself  
 By my doctor
